# Supplementary material for: Adsorption behavior of different cresols on bismuthene: a DFT study
Source: Royal Society of Chemistry journal article supplement (doi:10.1039/d4ra02933j), 2024-01-01
Supplement: d4ra02933j1.pdf [file d4ra02933j1.pdf]

### Supplementary Information I

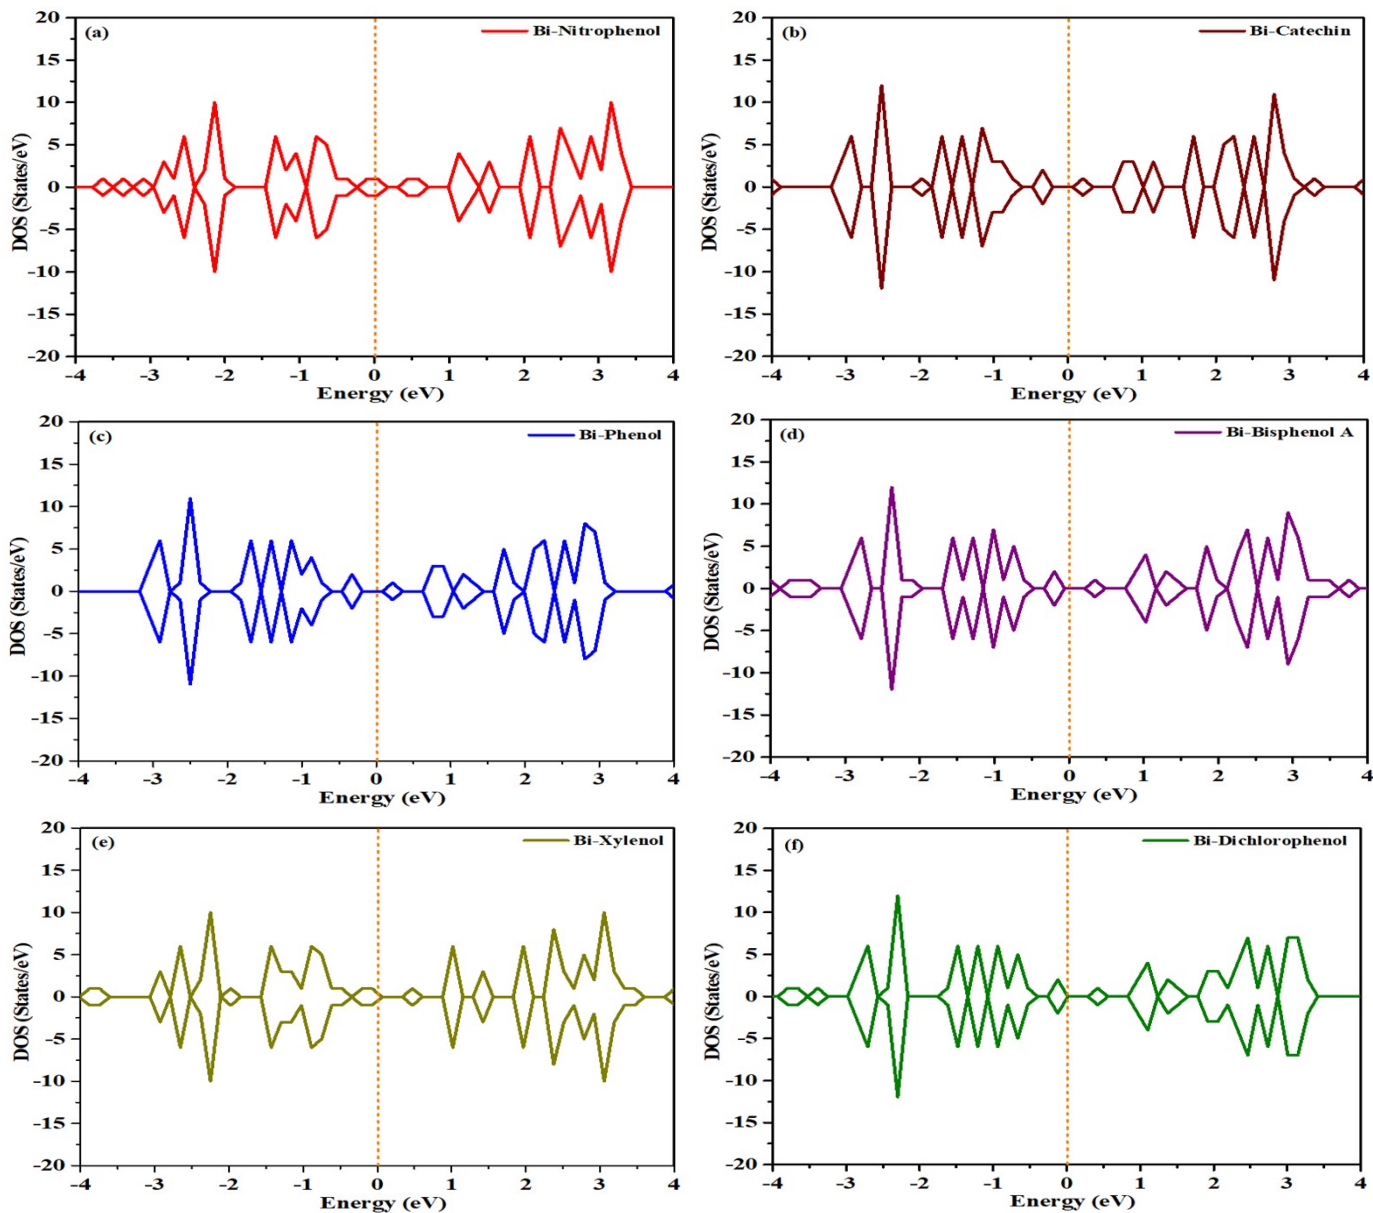

Figure : Spin-polarized density of states of phenolic compounds adsorbed on Bismuthene (a) O-Nitrophenol (b) Catechin (c) Phenol (d) Bisphenol A (e) Xylenol (f) Dichlorophenol
